# Supplementary material for: The Metabolites and Mechanism Analysis of Genistin against Hyperlipidemia via the UHPLC-Q-Exactive Orbitrap Mass Spectrometer and Metabolomics
Source: Molecules. 2023 Feb 28;28(5):2242. doi: 10.3390/molecules28052242 (PMC10005657; doi:10.3390/molecules28052242)
Supplement: Supplementary file 1 [file molecules-28-02242-s001.zip › supplementary Table S1.pdf]

**Supplementary Table 1.** Approximate values of fold changes of metabolites in the studied groups.

| Proposed identity                | Change Trend<br>(Mod/Con) | Change multiples<br>(Mod/Con)     | Change Trend<br>(Gen/Mod) | Change multiples<br>(Gen/Mod)     |
|----------------------------------|---------------------------|-----------------------------------|---------------------------|-----------------------------------|
| L-Tryptophan                     | ↑ <sup>*</sup>            | 1.58 times than that in Con group | ↓ <sup>##</sup>           | 0.51 times than that in Mod group |
| L-Proline                        | ↑ <sup>*</sup>            | 1.73 times than that in Con group | ↓ <sup>###</sup>          | 0.28 times than that in Mod group |
| Octadecanoic acid                | ↑ <sup>***</sup>          | 2.27 times than that in Con group | ↓ <sup>###</sup>          | 0.59 times than that in Mod group |
| 4-Amino-4-cyanobutanoic acid     | ↑ <sup>**</sup>           | 2.97 times than that in Con group | ↓ <sup>##</sup>           | 0.30 times than that in Mod group |
| sn-Glycero-3-phosphoethanolamine | ↑ <sup>**</sup>           | 2.16 times than that in Con group | ↓ <sup>##</sup>           | 0.45 times than that in Mod group |
| 5-Aminolevulinate                | ↑ <sup>**</sup>           | 1.86 times than that in Con group | ↓ <sup>###</sup>          | 0.41 times than that in Mod group |
| L-Leucine                        | ↓ <sup>***</sup>          | 0.62 times than that in Con group | ↑ <sup>#</sup>            | 1.32 times than that in Mod group |
| Creatine                         | ↓ <sup>****</sup>         | 0.64 times than that in Con group | ↑ <sup>##</sup>           | 1.28 times than that in Mod group |
| L-Carnitine                      | ↓ <sup>**</sup>           | 0.60 times than that in Con group | ↑ <sup>#</sup>            | 1.64 times than that in Mod group |
| O-Ureido-L-serine                | ↓ <sup>***</sup>          | 0.36 times than that in Con group | ↑ <sup>#</sup>            | 2.03 times than that in Mod group |
| anserine                         | ↓ <sup>****</sup>         | 0.15 times than that in Con group | ↑ <sup>##</sup>           | 3.80 times than that in Mod group |
| N-Formimino-L-aspartate          | ↓ <sup>**</sup>           | 0.56 times than that in Con group | ↑ <sup>##</sup>           | 1.96 times than that in Mod group |
| L-Ornithine                      | ↓ <sup>**</sup>           | 0.56 times than that in Con group | ↑ <sup>#</sup>            | 1.62 times than that in Mod group |
| 5-Hydroxyisourate                | ↓ <sup>**</sup>           | 0.33 times than that in Con group | ↑ <sup>##</sup>           | 1.90 times than that in Mod group |
| 2,3-Dihydroxycarbamazepine       | ↓ <sup>*</sup>            | 0.61 times than that in Con group | ↑ <sup>##</sup>           | 2.12 times than that in Mod group |

\* $p < 0.05$ , \*\* $p < 0.01$ , \*\*\* $p < 0.001$ , and \*\*\*\* $p < 0.0001$ , Con vs Mod; # $p < 0.05$ , ## $p < 0.01$ , and ### $p < 0.001$ , Gen vs Mod. Con: control group. Mod: model group. Gen: genistin high dose treatment group.
