# Supplementary material for: The Metabolites and Mechanism Analysis of Genistin against Hyperlipidemia via the UHPLC-Q-Exactive Orbitrap Mass Spectrometer and Metabolomics
Source: Molecules. 2023 Feb 28;28(5):2242. doi: 10.3390/molecules28052242 (PMC10005657; doi:10.3390/molecules28052242)
Supplement: Supplementary file 1 [file molecules-28-02242-s001.zip › supplementary Table S2.pdf]

**Supplementary Table 2.** Identified potential biomarkers regulated by genistin and their fragment ion information.

| Proposed identity                | Theoretical<br>( <i>m/z</i> ) | Experimental<br>( <i>m/z</i> ) | Error<br>(ppm) | Formula                                                       | Rt (min) | Ion Mode           | MS/MS fragment ions         |
|----------------------------------|-------------------------------|--------------------------------|----------------|---------------------------------------------------------------|----------|--------------------|-----------------------------|
| L-Tryptophan                     | 205.09619                     | 205.09621                      | -4.604         | C <sub>11</sub> H <sub>12</sub> N <sub>2</sub> O <sub>2</sub> | 1.864    | [M+H] <sup>+</sup> | 204, 187, 143, 142, 118     |
| L-Proline                        | 116.0703                      | 116.07033                      | -2.37          | C <sub>5</sub> H <sub>9</sub> NO <sub>2</sub>                 | 2.566    | [M+H] <sup>+</sup> | 70, 71, 74                  |
| Octadecanoic acid                | 283.26401                     | 283.26425                      | -0.013         | C <sub>18</sub> H <sub>36</sub> O <sub>2</sub>                | 4.756    | [M-H] <sup>-</sup> | 265, 182, 71                |
| 4-Amino-4-cyanobutanoic acid     | 129.06543                     | 129.06543                      | -3.208         | C <sub>5</sub> H <sub>8</sub> N <sub>2</sub> O <sub>2</sub>   | 5.565    | [M+H] <sup>+</sup> | 83, 56, 112, 84             |
| sn-Glycero-3-phosphoethanolamine | 214.04765                     | 214.04778                      | -3.816         | C <sub>5</sub> H <sub>14</sub> NO <sub>6</sub> P              | 6.486    | [M-H] <sup>-</sup> | 195, 140, 78, 152, 154      |
| 5-Aminolevulinate                | 132.06522                     | 132.06537                      | -1.134         | C <sub>5</sub> H <sub>9</sub> NO <sub>3</sub>                 | 5.86     | [M+H] <sup>+</sup> | 87, 114, 103, 70, 86        |
| L-Leucine                        | 132.10135                     | 132.10144                      | -3.522         | C <sub>6</sub> H <sub>13</sub> NO <sub>2</sub>                | 2.416    | [M+H] <sup>+</sup> | 86, 69, 116, 87             |
| Creatine                         | 132.07634                     | 132.07631                      | -3.128         | C <sub>4</sub> H <sub>9</sub> N <sub>3</sub> O <sub>2</sub>   | 5.395    | [M+H] <sup>+</sup> | 90, 87, 114                 |
| L-Carnitine                      | 162.11163                     | 162.11171                      | -4.687         | C <sub>7</sub> H <sub>15</sub> NO <sub>3</sub>                | 5.798    | [M+H] <sup>+</sup> | 103, 102, 98, 60, 85        |
| O-Ureido-L-serine                | 164.06592                     | 164.06596                      | -3.793         | C <sub>4</sub> H <sub>9</sub> N <sub>3</sub> O <sub>4</sub>   | 6.203    | [M+H] <sup>+</sup> | 146, 118, 90, 105, 60       |
| anserine                         | 239.1144                      | 239.11438                      | -2.441         | C <sub>10</sub> H <sub>16</sub> N <sub>4</sub> O <sub>3</sub> | 6.204    | [M-H] <sup>-</sup> | 168, 166, 87, 151, 195, 178 |
| N-Formimino-L-aspartate          | 161.05579                     | 161.05566                      | -0.144         | C <sub>5</sub> H <sub>8</sub> N <sub>2</sub> O <sub>4</sub>   | 6.356    | [M+H] <sup>+</sup> | 115, 116                    |
| L-Ornithine                      | 133.09659                     | 133.09665                      | -3.788         | C <sub>5</sub> H <sub>12</sub> N <sub>2</sub> O <sub>2</sub>  | 6.514    | [M+H] <sup>+</sup> | 88, 115, 70, 116            |
| 5-Hydroxyisourate                | 183.01495                     | 183.01508                      | -4.906         | C <sub>5</sub> H <sub>4</sub> N <sub>4</sub> O <sub>4</sub>   | 1.98     | [M-H] <sup>-</sup> | 112, 69, 140, 125, 126, 97  |
| 2,3-Dihydroxycarbamazepine       | 269.0932                      | 269.0932                       | 4.204          | C <sub>15</sub> H <sub>12</sub> N <sub>2</sub> O <sub>3</sub> | 6.336    | [M+H] <sup>+</sup> | 241, 239, 213               |

\**p* < 0.05, \*\**p* < 0.01, \*\*\**p* < 0.001, and \*\*\*\**p* < 0.0001, Con vs Mod; #*p* < 0.05, ##*p* < 0.01, and ###*p* < 0.001, Gen vs Mod.
